# Supplementary material for: Adverse Drug Reactions of Intranasal Corticosteroids in the Netherlands: An Analysis from the Netherlands Pharmacovigilance Center
Source: PubMed Central journal article supplement — Drugs Real World Outcomes. 2022 Jun 3;9(3):321–31. doi: 10.1007/s40801-022-00301-x (PMC9392821; doi:10.1007/s40801-022-00301-x), 2022-06-03
Supplement: 40801_2022_301_MOESM1_ESM.pdf [file 40801_2022_301_MOESM1_ESM.pdf]

## Supplementary Information

**Article Title:** Adverse Drug Reactions of Intranasal Corticosteroids in the Netherlands: An Analysis from the Netherlands Pharmacovigilance Center.

**Journal name:** Drugs - Real World Outcomes

**Author names:** Rollema C<sup>1</sup>, Van Roon EN<sup>1,2</sup>, Ekhart C<sup>3</sup>, Van Hunsel FPAM<sup>3</sup>, De Vries TW<sup>4</sup>

**Affiliations:**

<sup>1</sup> Department of Clinical Pharmacy and Pharmacology, Medical Centre Leeuwarden, Leeuwarden, the Netherlands

<sup>2</sup> Groningen Research Institute of Pharmacy, Department PharmacoTherapy, -Epidemiology and -Economy, University of Groningen, Groningen, the Netherlands

<sup>3</sup> Netherlands Pharmacovigilance Center Lareb, 's Hertogenbosch, the Netherlands.

<sup>4</sup> Department of Paediatrics, Medical Centre Leeuwarden, Leeuwarden, the Netherlands

**E-mail address of the corresponding author:** c.rollema@rug.nl

Table 1: Overview of reported ADRs on HLT level

| ADR (HLT name)                                                 | Includes (PT name)                                                                                                                                                                                                               | Reports |
|----------------------------------------------------------------|----------------------------------------------------------------------------------------------------------------------------------------------------------------------------------------------------------------------------------|---------|
| Nasal disorders NEC                                            | Epistaxis Nasal crusting; Nasal disorder; Nasal dryness; Nasal mucosal disorder; Nasal oedema; Nasal polyps; Nasal pruritus; Nasal septum perforation                                                                            | 159     |
| Headaches NEC                                                  | Headache; Sinus headache                                                                                                                                                                                                         | 145     |
| Upper respiratory tract signs and symptoms                     | Aphonia; Dry throat; Dysphonia; Nasal discomfort; Oropharyngeal discomfort; Oropharyngeal pain; Rhinalgia; Rhinorrhoea; Sneezing; Throat irritation; Throat tightness; Yawning                                                   | 105     |
| Olfactory nerve disorders                                      | Anosmia; Hyposmia; Parosmia                                                                                                                                                                                                      | 95      |
| Sensory abnormalities NEC                                      | Ageusia; Dysgeusia; Hypogeusia; Sensory disturbance; Taste disorder                                                                                                                                                              | 78      |
| Neurological signs and symptoms NEC                            | Dizziness; Head discomfort; Presyncope                                                                                                                                                                                           | 70      |
| Breathing abnormalities                                        | Dyspnoea; Dyspnoea exertional; Hyperventilation; Respiratory distress                                                                                                                                                            | 60      |
| Therapeutic and nontherapeutic responses                       | Adverse event; Drug ineffective; Drug intolerance; Therapeutic product effect decreased; Therapeutic product effect incomplete; Therapeutic product ineffective; Therapeutic response decreased; Therapeutic response unexpected | 60      |
| Cardiac signs and symptoms NEC                                 | Palpitations                                                                                                                                                                                                                     | 52      |
| Rashes, eruptions and exanthems NEC                            | Rash; Rash erythematous; Rash macular; Rash pruritic; Rash vesicular                                                                                                                                                             | 46      |
| Asthenic conditions                                            | Asthenia; Fatigue; Malaise                                                                                                                                                                                                       | 44      |
| Nausea and vomiting symptoms                                   | Nausea; Retching; Vomiting                                                                                                                                                                                                       | 43      |
| Upper respiratory tract infections                             | Nasal abscess; Nasopharyngitis; Pharyngitis; Rhinitis; Sinusitis; Tonsillitis; Upper respiratory tract infection                                                                                                                 | 35      |
| Anxiety symptoms                                               | Agitation; Anxiety; Nervousness; Stress; Tension                                                                                                                                                                                 | 32      |
| General signs and symptoms NEC                                 | Condition aggravated; Crying; Exercise tolerance decreased; Illness; Influenza like illness; Peripheral swelling; Secretion discharge; Swelling; Swelling face                                                                   | 29      |
| Visual disorders NEC                                           | Diplopia; Photopsia; Vision blurred                                                                                                                                                                                              | 28      |
| Disturbances in consciousness NEC                              | Loss of consciousness; Somnolence; Stupor; Syncope                                                                                                                                                                               | 25      |
| Pain and discomfort NEC                                        | Chest discomfort; Chest pain; Discomfort; Facial pain; Pain                                                                                                                                                                      | 25      |
| Visual impairment and blindness (excl colour blindness)        | Blindness; Visual acuity reduced; Visual impairment                                                                                                                                                                              | 24      |
| Coughing and associated symptoms                               | Cough; Haemoptysis; Productive cough; Sputum increased                                                                                                                                                                           | 23      |
| Feelings and sensations NEC                                    | Chills; Feeling abnormal; Feeling cold; Feeling hot; Feeling jittery; Feeling of body temperature change; Hunger; Sensation of foreign body; Sense of oppression                                                                 | 23      |
| Inner ear signs and symptoms                                   | Tinnitus; Vertigo                                                                                                                                                                                                                | 23      |
| Ocular disorders NEC                                           | Eye disorder; Eye pain; Eye swelling; Lens disorder; Ocular discomfort; Periorbital oedema                                                                                                                                       | 23      |
| Pruritus NEC                                                   | Pruritus                                                                                                                                                                                                                         | 23      |
| Paraesthesias and dysaesthesias                                | Burning sensation; Burning sensation mucosal; Hyperaesthesia; Hypoaesthesia; Paraesthesia                                                                                                                                        | 22      |
| Nasal congestion and inflammations                             | Nasal congestion                                                                                                                                                                                                                 | 20      |
| Disturbances in initiating and maintaining sleep               | Initial insomnia; Insomnia                                                                                                                                                                                                       | 19      |
| Migraine headaches                                             | Migraine; Migraine with aura; Migraine without aura                                                                                                                                                                              | 19      |
| Bronchospasm and obstruction                                   | Asthma; Bronchospasm; Chronic obstructive pulmonary disease; Wheezing                                                                                                                                                            | 18      |
| Ocular infections, inflammations and associated manifestations | Eye inflammation; Eye irritation; Ocular hyperaemia                                                                                                                                                                              | 17      |
| Tongue signs and symptoms                                      | Glossodynia; Swollen tongue; Tongue blistering; Tongue discolouration; Tongue erythema; Tongue oedema                                                                                                                            | 17      |
| Interactions                                                   | Drug interaction; Food interaction; Inhibitory drug interaction                                                                                                                                                                  | 16      |
| Urticarias                                                     | Urticaria                                                                                                                                                                                                                        | 16      |
| Gastrointestinal and abdominal pains (excl oral and throat)    | Abdominal pain; Abdominal pain upper                                                                                                                                                                                             | 15      |
| Rate and rhythm disorders NEC                                  | Arrhythmia; Extrasystoles; Tachycardia                                                                                                                                                                                           | 14      |
| Allergic conditions NEC                                        | Hypersensitivity                                                                                                                                                                                                                 | 13      |
| Cataract conditions                                            | Cataract; Cataract subcapsular                                                                                                                                                                                                   | 13      |
| Haemorrhages NEC                                               | Haematoma; Haemorrhage                                                                                                                                                                                                           | 13      |
| Dermatitis and eczema                                          | Dermatitis; Dermatitis allergic; Dermatitis contact; Eczema; Perioral dermatitis                                                                                                                                                 | 12      |
| Eye and eyelid infections                                      | Conjunctivitis; Eye infection; Hordeolum; Retinitis                                                                                                                                                                              | 12      |
| Muscle pains                                                   | Myalgia                                                                                                                                                                                                                          | 12      |
| Oral soft tissue signs and symptoms                            | Hypoaesthesia oral; Odynophagia; Oral discomfort; Oral mucosal blistering; Oral pain; Paraesthesia oral                                                                                                                          | 12      |
| Angioedemas                                                    | Angioedema                                                                                                                                                                                                                       | 11      |
| Apocrine and eccrine gland disorders                           | Hyperhidrosis; Night sweats                                                                                                                                                                                                      | 11      |
| Dermal and epidermal conditions NEC                            | Papule; Scab; Skin burning sensation; Skin disorder; Skin odour                                                                                                                                                                  | 11      |

|                                                                  |                                                                                                                                                   |    |
|------------------------------------------------------------------|---------------------------------------------------------------------------------------------------------------------------------------------------|----|
|                                                                  | abnormal; Skin reaction; Skin warm                                                                                                                |    |
| Diarrhoea (excl infective)                                       | Diarrhoea                                                                                                                                         | 11 |
| Erythemas                                                        | Erythema                                                                                                                                          | 11 |
| Lacrimation disorders                                            | Dry eye; Lacrimation disorder; Lacrimation increased                                                                                              | 11 |
| Menstruation and uterine bleeding NEC                            | Menstrual disorder; Menstruation irregular; Metrorrhagia                                                                                          | 11 |
| Mood alterations with depressive symptoms                        | Depressed mood; Feeling of despair; Negative thoughts; Tearfulness                                                                                | 11 |
| Oedema NEC                                                       | Face oedema; Oedema peripheral                                                                                                                    | 11 |
| Parasomnias                                                      | Abnormal dreams; Nightmare; Parasomnia; Somnambulism                                                                                              | 11 |
| Product quality issues NEC                                       | Product complaint; Product quality issue; Product substitution issue                                                                              | 11 |
| Appetite disorders                                               | Appetite disorder; Decreased appetite                                                                                                             | 10 |
| Alopecias                                                        | Alopecia; Alopecia areata                                                                                                                         | 9  |
| Dyspeptic signs and symptoms                                     | Dyspepsia; Eructation                                                                                                                             | 9  |
| Ear disorders NEC                                                | Ear congestion; Ear discomfort; Ear pain                                                                                                          | 9  |
| Gastrointestinal signs and symptoms NEC                          | Abdominal discomfort; Breath odour; Dysphagia                                                                                                     | 9  |
| Glaucomas (excl congenital)                                      | Glaucoma; Ocular hypertension                                                                                                                     | 9  |
| Muscle related signs and symptoms NEC                            | Muscle mass; Muscle spasms; Myokymia                                                                                                              | 9  |
| Oral dryness and saliva altered                                  | Dry mouth; Saliva altered; Salivary hypersecretion                                                                                                | 9  |
| Pharyngeal disorders (excl infections and neoplasms)             | Pharyngeal hypoaesthesia; Pharyngeal swelling; Tonsillar disorder                                                                                 | 9  |
| Physical examination procedures and organ system status          | Body temperature decreased; Weight decreased; Weight increased                                                                                    | 9  |
| Application and instillation site reactions                      | Application site burn; Application site reaction                                                                                                  | 8  |
| Candida infections                                               | Candida infection; Oesophageal candidiasis; Oral candidiasis                                                                                      | 8  |
| Ophthalmic function diagnostic procedures                        | Intraocular pressure increased                                                                                                                    | 8  |
| Panic attacks and disorders                                      | Panic attack; Panic reaction                                                                                                                      | 8  |
| Adrenal cortical hyperfunctions                                  | Cushing's syndrome; Cushingoid                                                                                                                    | 7  |
| Dyskinesias and movement disorders NEC                           | Psychomotor hyperactivity                                                                                                                         | 7  |
| Heart rate and pulse investigations                              | Heart rate decreased; Heart rate increased; Heart rate irregular                                                                                  | 7  |
| Joint related signs and symptoms                                 | Arthralgia; Joint stiffness                                                                                                                       | 7  |
| Medication errors, product use errors and issues NEC             | Device difficult to use; Product use complaint; Product use in unapproved indication; Product use issue; Wrong technique in product usage process | 7  |
| Memory loss (excl dementia)                                      | Memory impairment                                                                                                                                 | 7  |
| Mental impairment (excl dementia and memory loss)                | Disturbance in attention; Mental impairment                                                                                                       | 7  |
| Oral soft tissue swelling and oedema                             | Lip swelling; Oedema mouth; Palatal swelling                                                                                                      | 7  |
| Choroid and vitreous structural change, deposit and degeneration | Chorioretinopathy; Vitreous detachment; Vitreous floaters                                                                                         | 6  |
| Emotional and mood disturbances NEC                              | Anger; Euphoric mood; Irritability                                                                                                                | 6  |
| Hearing losses                                                   | Deafness; Hypoacusis                                                                                                                              | 6  |
| Hypertrichoses                                                   | Hirsutism; Hypertrichosis                                                                                                                         | 6  |
| Musculoskeletal and connective tissue pain and discomfort        | Back pain; Neck pain; Pain in extremity                                                                                                           | 6  |
| Purpura and related conditions                                   | Ecchymosis; Petechiae; Purpura                                                                                                                    | 6  |
| Tongue disorders                                                 | Glossitis; Tongue disorder                                                                                                                        | 6  |
| Tremor (excl congenital)                                         | Tremor                                                                                                                                            | 6  |
| Adrenal cortical hypofunctions                                   | Adrenal insufficiency; Adrenal suppression; Secondary adrenocortical insufficiency                                                                | 5  |
| Bullous conditions                                               | Blister; Dermatitis bullous; Pemphigus                                                                                                            | 5  |
| Coordination and balance disturbances                            | Balance disorder                                                                                                                                  | 5  |
| Exposures associated with pregnancy, delivery and lactation      | Exposure during pregnancy; Foetal exposure during pregnancy; Maternal exposure during pregnancy                                                   | 5  |
| Febrile disorders                                                | Pyrexia                                                                                                                                           | 5  |
| Flatulence, bloating and distension                              | Abdominal distension; Flatulence                                                                                                                  | 5  |
| Fungal infections NEC                                            | Fungal infection; Fungal oesophagitis; Tongue fungal infection; Vulvovaginal mycotic infection                                                    | 5  |
| Lid, lash and lacrimal infections, irritations and inflammations | Eyelid irritation; Eyelid oedema; Swelling of eyelid                                                                                              | 5  |
| Lower respiratory tract signs and symptoms                       | Bronchial irritation; Hiccups; Increased bronchial secretion                                                                                      | 5  |
| Musculoskeletal and connective tissue conditions NEC             | Growth retardation                                                                                                                                | 5  |
| Peripheral vascular disorders NEC                                | Flushing; Hot flush; Peripheral vascular disorder                                                                                                 | 5  |
| Product physical issues                                          | Product odour abnormal; Product taste abnormal                                                                                                    | 5  |
| Skin hypoplasias and atrophies                                   | Skin atrophy; Skin striae                                                                                                                         | 5  |
| Vascular hypertensive disorders NEC                              | Hypertension                                                                                                                                      | 5  |
| Allergies to foods, food additives, drugs and other chemicals    | Drug hypersensitivity<br>Reaction to excipient                                                                                                    | 4  |
| Anaphylactic and anaphylactoid responses                         | Anaphylactic reaction                                                                                                                             | 4  |

|                                                                   |                                                                                                  |   |
|-------------------------------------------------------------------|--------------------------------------------------------------------------------------------------|---|
|                                                                   | Anaphylactic shock                                                                               |   |
| Bone related signs and symptoms                                   | Pain in jaw                                                                                      | 4 |
| Carbohydrate tolerance analyses (incl diabetes)                   | Blood glucose abnormal; Blood glucose increased                                                  | 4 |
| Fluctuating mood symptoms                                         | Mood swings                                                                                      | 4 |
| Herpes viral infections                                           | Herpes simplex; Herpes zoster; Varicella                                                         | 4 |
| Increased physical activity levels                                | Restlessness                                                                                     | 4 |
| Mucosal findings abnormal                                         | Mucosal disorder; Mucosal inflammation; Oedema mucosal                                           | 4 |
| Muscle weakness conditions                                        | Muscular weakness                                                                                | 4 |
| Ocular bleeding and vascular disorders NEC                        | Eye haemorrhage                                                                                  | 4 |
| Off label uses                                                    | Off label use                                                                                    | 4 |
| Oral soft tissue disorders NEC                                    | Cheilitis; Oral disorder                                                                         | 4 |
| Sleep disturbances NEC                                            | Poor quality sleep                                                                               | 4 |
| Supraventricular arrhythmias                                      | Atrial fibrillation; Sinus bradycardia                                                           | 4 |
| Vascular tests NEC (incl blood pressure)                          | Blood pressure decreased; Blood pressure increased                                               | 4 |
| Abortions not specified as induced or spontaneous                 | Abortion                                                                                         | 3 |
| Acnes                                                             | Acne; Dermatitis acneiform                                                                       | 3 |
| Adjustment disorders                                              | Adjustment disorder with depressed mood                                                          | 3 |
| Behaviour and socialisation disturbances                          | Aggression                                                                                       | 3 |
| Bladder and urethral symptoms                                     | Dysuria; Micturition disorder; Urinary incontinence                                              | 3 |
| Confusion and disorientation                                      | Confusional state                                                                                | 3 |
| Dental surface disorders                                          | Tooth discolouration                                                                             | 3 |
| Depressive disorders                                              | Depression                                                                                       | 3 |
| Erection and ejaculation conditions and disorders                 | Erectile dysfunction                                                                             | 3 |
| Exfoliative conditions                                            | Exfoliative rash; Skin exfoliation                                                               | 3 |
| Faecal abnormalities NEC                                          | Abnormal faeces; Faeces hard; Faeces soft                                                        | 3 |
| Gastrointestinal atonic and hypomotility disorders NEC            | Constipation; Gastroesophageal reflux disease                                                    | 3 |
| Hyperacusia                                                       | Hyperacusis                                                                                      | 3 |
| Inflammations                                                     | Granuloma; Inflammation                                                                          | 3 |
| Lower respiratory tract and lung infections                       | Bronchitis; Lower respiratory tract infection; Pneumonia                                         | 3 |
| Lymphatic system disorders NEC                                    | Lymphadenopathy                                                                                  | 3 |
| Menstruation with decreased bleeding                              | Amenorrhoea                                                                                      | 3 |
| Metabolic bone disorders                                          | Osteopenia; Osteoporosis                                                                         | 3 |
| Mood alterations with manic symptoms                              | Hypomania                                                                                        | 3 |
| Ocular sensation disorders                                        | Asthenopia; Photophobia                                                                          | 3 |
| Paranasal sinus disorders (excl infections and neoplasms)         | Sinus congestion; Sinus disorder                                                                 | 3 |
| Product administration errors and issues                          | Incorrect dose administered; Incorrect dose administered by device; Product administration error | 3 |
| Psychiatric elimination disorders                                 | Enuresis                                                                                         | 3 |
| Pupil disorders                                                   | Mydriasis                                                                                        | 3 |
| Retinal structural change, deposit and degeneration               | Macular degeneration; Retinal degeneration; Retinal detachment                                   | 3 |
| Seizures and seizure disorders NEC                                | Epilepsy; Seizure                                                                                | 3 |
| Stomatitis and ulceration                                         | Aphthous ulcer; Mouth ulceration; Stomatitis                                                     | 3 |
| Tendon disorders                                                  | Tendon disorder; Tendon pain                                                                     | 3 |
| Vulvovaginal disorders NEC                                        | Vaginal haemorrhage                                                                              | 3 |
| Adrenal cortex tests                                              | Cortisol decreased; Glucocorticoids increased                                                    | 2 |
| Breast disorders NEC                                              | Gynaecomastia                                                                                    | 2 |
| Breast signs and symptoms                                         | Breast pain; Nipple swelling                                                                     | 2 |
| Cardiac valve disorders NEC                                       | Cardiac valve disease                                                                            | 2 |
| Central nervous system haemorrhages and cerebrovascular accidents | Cerebral infarction                                                                              | 2 |
| Coagulation and bleeding analyses                                 | Bleeding time prolonged; International normalised ratio fluctuation                              | 2 |
| Cognitive and attention disorders and disturbances NEC            | Daydreaming                                                                                      | 2 |
| Conjunctival and corneal bleeding and vascular disorders          | Conjunctival haemorrhage                                                                         | 2 |
| Dental pain and sensation disorders                               | Toothache                                                                                        | 2 |
| Device issues NEC                                                 | Device issue                                                                                     | 2 |
| Device malfunction events NEC                                     | Device malfunction; Device occlusion                                                             | 2 |
| Hepatocellular damage and hepatitis NEC                           | Liver injury                                                                                     | 2 |
| Hyperglycaemic conditions NEC                                     | Hyperglycaemia                                                                                   | 2 |
| Immunodeficiency disorders NEC                                    | Immunodeficiency; Immunosuppression                                                              | 2 |
| Influenza viral infections                                        | Influenza                                                                                        | 2 |

|                                                                 |                                               |   |
|-----------------------------------------------------------------|-----------------------------------------------|---|
| Lactation disorders                                             | Lactation disorder; Suppressed lactation      | 2 |
| Nail and nail bed conditions (excl infections and infestations) | Nail bed inflammation; Onychoclasia           | 2 |
| Neuromuscular disorders NEC                                     | Muscle contractions involuntary               | 2 |
| Oesophagitis (excl infective)                                   | Oesophagitis                                  | 2 |
| Paralysis and paresis (excl cranial nerve)                      | Hemiparesis                                   | 2 |
| Pilar disorders NEC                                             | Hair colour changes; Hair growth abnormal     | 2 |
| Product supply and availability issues                          | Product availability issue                    | 2 |
| Renal failure and impairment                                    | Acute kidney injury; Renal impairment         | 2 |
| Respiratory tract disorders NEC                                 | Lung disorder; Respiratory tract irritation   | 2 |
| Retinal bleeding and vascular disorders (excl retinopathy)      | Retinal haemorrhage; Retinal vein thrombosis  | 2 |
| Site specific vascular disorders NEC                            | Pallor                                        | 2 |
| Skin structures and soft tissue infections                      | Folliculitis<br>Pyoderma                      | 2 |
| Sleep disorders NEC                                             | Sleep disorder                                | 2 |
| Speech and language abnormalities                               | Speech disorder                               | 2 |
| Stillbirth and foetal death                                     | Foetal death                                  | 2 |
| Suicidal and self-injurious behaviour                           | Suicidal ideation                             | 2 |
| Therapeutic procedures NEC                                      | Therapy cessation                             | 2 |
| Withdrawal and rebound effects                                  | Drug withdrawal syndrome                      | 2 |
| Accidental exposures to product                                 | Accidental exposure to product                | 1 |
| Acute and chronic pancreatitis                                  | Pancreatitis acute                            | 1 |
| Affect alterations NEC                                          | Affect lability                               | 1 |
| Arthropathies NEC                                               | Arthropathy                                   | 1 |
| Attention deficit and disruptive behaviour disorders            | Attention deficit hyperactivity disorder      | 1 |
| Autosomal chromosomal abnormalities                             | Trisomy 21                                    | 1 |
| Cardiac disorders congenital NEC                                | Heart disease congenital                      | 1 |
| Cardiac disorders NEC                                           | Cardiac disorder                              | 1 |
| Central nervous system and spinal infections                    | Brain abscess                                 | 1 |
| Cholestasis and jaundice                                        | Cholestasis                                   | 1 |
| Circulatory collapse and shock                                  | Shock                                         | 1 |
| Colitis (excl infective)                                        | Colitis ulcerative                            | 1 |
| Conditions associated with abnormal gas exchange                | Asphyxia                                      | 1 |
| Corneal structural change, deposit and degeneration             | Corneal perforation                           | 1 |
| Death and sudden death                                          | Death                                         | 1 |
| Delusional symptoms                                             | Delusion                                      | 1 |
| Dental and periodontal infections and inflammations             | Dental caries                                 | 1 |
| Device operational issues NEC                                   | Device operational issue                      | 1 |
| Diabetes mellitus (incl subtypes)                               | Steroid diabetes                              | 1 |
| Ear infections                                                  | Otitis media                                  | 1 |
| Eating disorders NEC                                            | Binge eating                                  | 1 |
| Eustachian tube disorders                                       | Eustachian tube patulous                      | 1 |
| Eye complications associated with device                        | Eye complication associated with device       | 1 |
| Eyelid movement disorders                                       | Excessive eye blinking                        | 1 |
| Facial cranial nerve disorders                                  | Facial paralysis                              | 1 |
| Female reproductive tract infections                            | Vaginal infection                             | 1 |
| Foetal growth complications                                     | Foetal growth restriction                     | 1 |
| Gait disturbances                                               | Gait disturbance                              | 1 |
| Gastric ulcers and perforation                                  | Gastric ulcer                                 | 1 |
| Gastrointestinal disorders NEC                                  | Gastrointestinal disorder                     | 1 |
| Gastrointestinal mucosal dystrophies and secretion disorders    | Gastrointestinal tract mucosal discolouration | 1 |
| Gastrointestinal spastic and hypermotility disorders            | Oesophageal spasm                             | 1 |
| General nutritional disorders NEC                               | Obesity                                       | 1 |
| Gingival disorders, signs and symptoms NEC                      | Gingival pain                                 | 1 |
| Hallucinations (excl sleep-related)                             | Hallucination                                 | 1 |
| Impulse control disorders                                       | Impulsive behaviour                           | 1 |
| Infections NEC                                                  | Respiratory tract infection                   | 1 |
| Iris and uveal tract infections, irritations and inflammations  | Iridocyclitis                                 | 1 |
| Ischaemic coronary artery disorders                             | Arteriospasm coronary                         | 1 |
| Laryngeal and adjacent sites disorders NEC                      | Laryngeal disorder                            | 1 |

|                                                                                                                                                                                                       |                                      |   |
|-------------------------------------------------------------------------------------------------------------------------------------------------------------------------------------------------------|--------------------------------------|---|
| (excl infections and neoplasms)                                                                                                                                                                       |                                      |   |
| Laryngeal spasm, oedema and obstruction                                                                                                                                                               | Laryngotracheal oedema               | 1 |
| Limb fractures and dislocations                                                                                                                                                                       | Hip fracture                         | 1 |
| Marrow depression and hypoplastic anaemias                                                                                                                                                            | Pancytopenia                         | 1 |
| Mass conditions NEC                                                                                                                                                                                   | Mass                                 | 1 |
| Mental disorders NEC                                                                                                                                                                                  | Mental disorder                      | 1 |
| Middle ear disorders NEC                                                                                                                                                                              | Middle ear disorder                  | 1 |
| Mood disorders NEC                                                                                                                                                                                    | Affective disorder                   | 1 |
| Motor neurone diseases                                                                                                                                                                                | Motor neurone disease                | 1 |
| Muscle tone abnormal                                                                                                                                                                                  | Serotonin syndrome                   | 1 |
| Muscle, tendon and ligament injuries                                                                                                                                                                  | Tendon rupture                       | 1 |
| Musculoskeletal and connective tissue disorders of limbs congenital                                                                                                                                   | Congenital hand malformation         | 1 |
| Myopathies                                                                                                                                                                                            | Myopathy                             | 1 |
| Neurologic visual problems NEC                                                                                                                                                                        | Visual field defect                  | 1 |
| Neutropenias                                                                                                                                                                                          | Neutropenia                          | 1 |
| Non-site specific gastrointestinal haemorrhages                                                                                                                                                       | Upper gastrointestinal haemorrhage   | 1 |
| Peripheral neuropathies NEC                                                                                                                                                                           | Polyneuropathy                       | 1 |
| Photosensitivity and photodermatitis conditions                                                                                                                                                       | Photosensitivity reaction            | 1 |
| Psychiatric symptoms NEC                                                                                                                                                                              | Psychiatric symptom                  | 1 |
| Reproductive tract signs and symptoms NEC                                                                                                                                                             | Pruritus genital                     | 1 |
| Respiratory tract and thoracic histopathology procedures                                                                                                                                              | Sputum abnormal                      | 1 |
| Retinopathies NEC                                                                                                                                                                                     | Retinopathy                          | 1 |
| Sebaceous gland disorders                                                                                                                                                                             | Seborrhoea                           | 1 |
| Skin haemorrhages                                                                                                                                                                                     | Skin haemorrhage                     | 1 |
| Skin injuries NEC                                                                                                                                                                                     | Contusion                            | 1 |
| Skin vasculitides                                                                                                                                                                                     | Hypersensitivity vasculitis          | 1 |
| Speech articulation and rhythm disturbances                                                                                                                                                           | Dysphemia                            | 1 |
| Spermatogenesis and semen disorders                                                                                                                                                                   | Azoospermia                          | 1 |
| Staphylococcal infections                                                                                                                                                                             | Furuncle                             | 1 |
| Stereotypies and automatisms                                                                                                                                                                          | Bruxism                              | 1 |
| Testicular and epididymal disorders NEC                                                                                                                                                               | Testicular pain                      | 1 |
| Tic disorders                                                                                                                                                                                         | Tic                                  | 1 |
| Tissue enzyme analyses NEC                                                                                                                                                                            | Blood alkaline phosphatase increased | 1 |
| Total fluid volume increased                                                                                                                                                                          | Fluid retention                      | 1 |
| Trigeminal disorders                                                                                                                                                                                  | Trigeminal neuralgia                 | 1 |
| Ulcers NEC                                                                                                                                                                                            | Ulcer                                | 1 |
| Unintended pregnancies                                                                                                                                                                                | Unintended pregnancy                 | 1 |
| Urinary abnormalities                                                                                                                                                                                 | Haematuria                           | 1 |
| Vagus nerve disorders                                                                                                                                                                                 | Vocal cord paralysis                 | 1 |
| Vascular hypotensive disorders                                                                                                                                                                        | Orthostatic hypotension              | 1 |
| <b>Abbreviations</b>                                                                                                                                                                                  |                                      |   |
| ADR, adverse drug reaction                                                                                                                                                                            |                                      |   |
| HLT, High Level Term NAME OF MedDRA [12]                                                                                                                                                              |                                      |   |
| NEC, Not elsewhere classified is a standard abbreviation used to denote groupings of miscellaneous terms that do not readily fit into other hierarchical classifications within a particular SOC [12] |                                      |   |
| PTname, Preferred Term name of MedDRA [12]                                                                                                                                                            |                                      |   |
| SOC, System Organ Class level of MedDRA [12]                                                                                                                                                          |                                      |   |
